# Supplementary material for: Discerning Apical and Basolateral Properties of HT-29/B6 and IPEC-J2 Cell Layers by Impedance Spectroscopy, Mathematical Modeling and Machine Learning
Source: PubMed Central journal article supplement (PMC3698131; doi:10.1371/journal.pone.0062913), 2013-07-01
Supplement: pone.0062913.s001.pdf [file pone.0062913.s001.pdf]

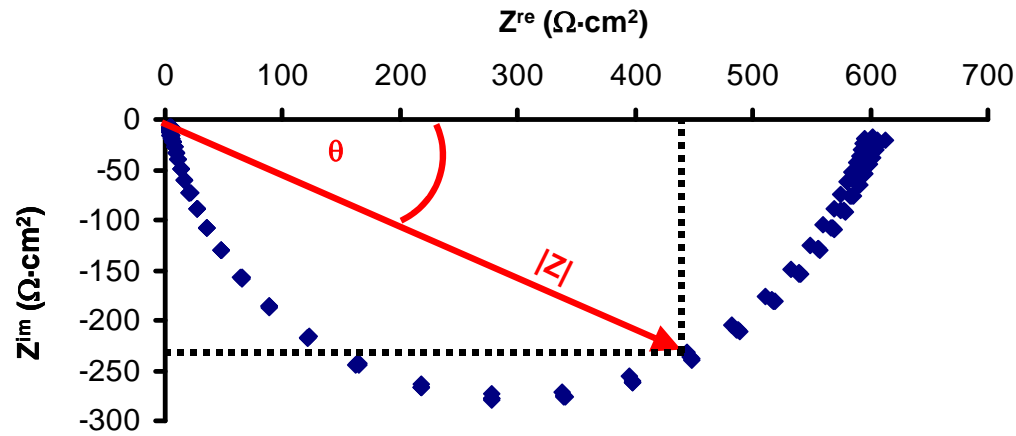

**Fig. S1: Nyquist diagram of HT-29/B6 impedance spectra**

Four consecutive impedance spectra of an HT-29/B6 cell layer mounted in an Ussing chamber were recorded at 42 different frequencies,  $f$  (◆). As an example, impedance magnitude  $|Z|$  and phase angle  $\theta$  between transepithelial alternating current (AC) and voltage are depicted for  $f \approx 33$  Hz (red arrow). Real ( $Z^{\text{re}}$ ) and imaginary part ( $Z^{\text{im}}$ ) of the complex impedance (total impedance  $Z^{\text{T}}(f) = Z^{\text{re}}(f) + i \cdot Z^{\text{im}}(f)$ ,  $i = \sqrt{-1}$ ) are the projections onto the x- and y-axis.

For  $f \rightarrow 0$  (DC conditions),  $\theta \rightarrow 0^\circ$ . For  $f \rightarrow \infty$ ,  $\theta \rightarrow 90^\circ$ .
