# Supplementary material for: Discerning Apical and Basolateral Properties of HT-29/B6 and IPEC-J2 Cell Layers by Impedance Spectroscopy, Mathematical Modeling and Machine Learning
Source: PubMed Central journal article supplement (PMC3698131; doi:10.1371/journal.pone.0062913), 2013-07-01
Supplement: pone.0062913.s004.pdf [file pone.0062913.s004.pdf]

ANN<sub>sub</sub><sup>HT</sup>

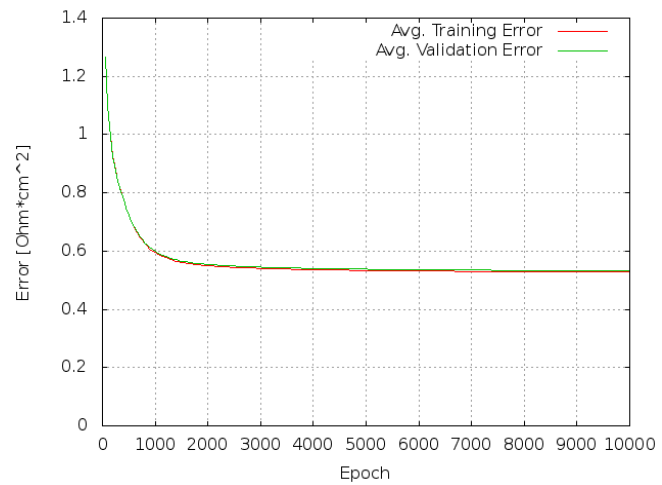

ANN<sub>sub</sub><sup>HT+EGTA</sup>

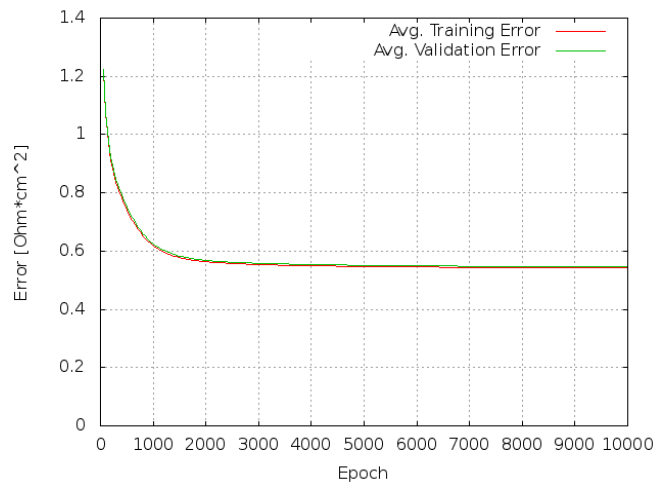

ANN<sub>epi</sub><sup>HT</sup>

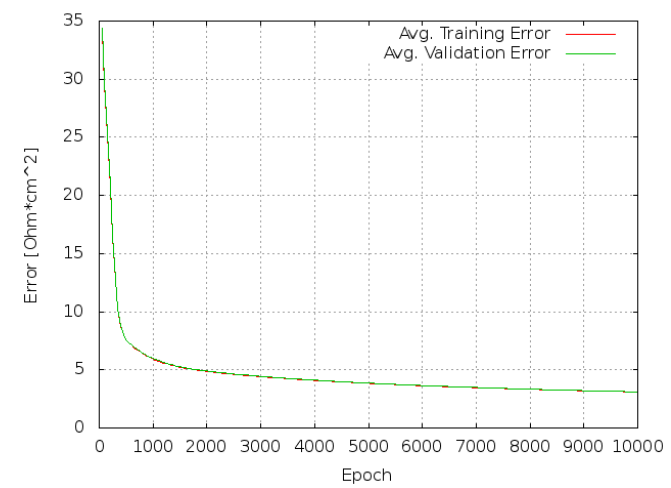

ANN<sub>epi</sub><sup>HT+EGTA</sup>

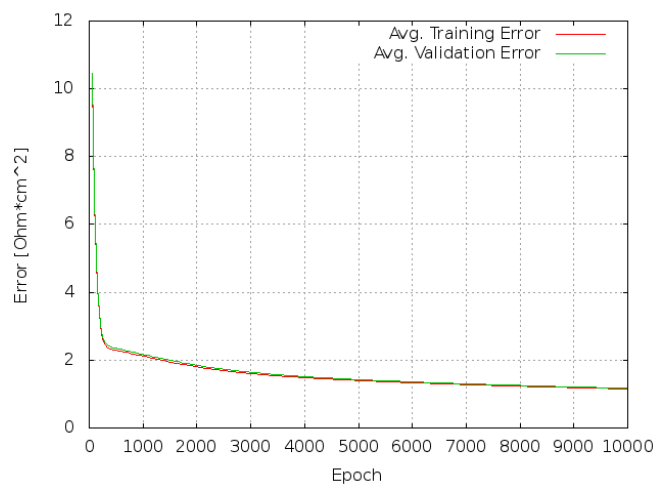

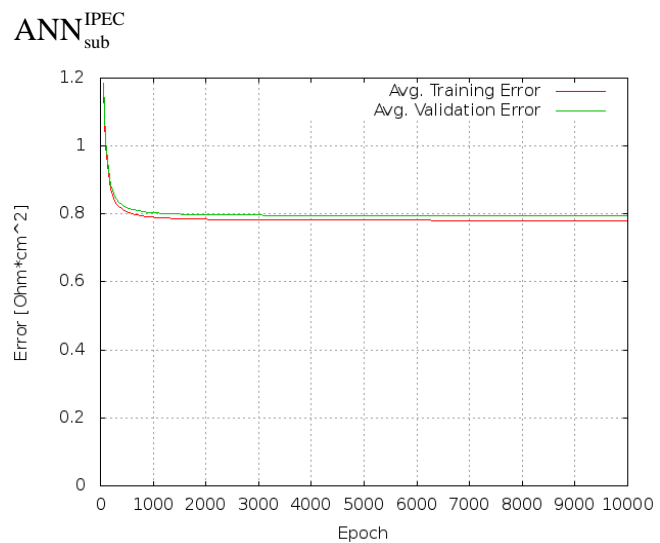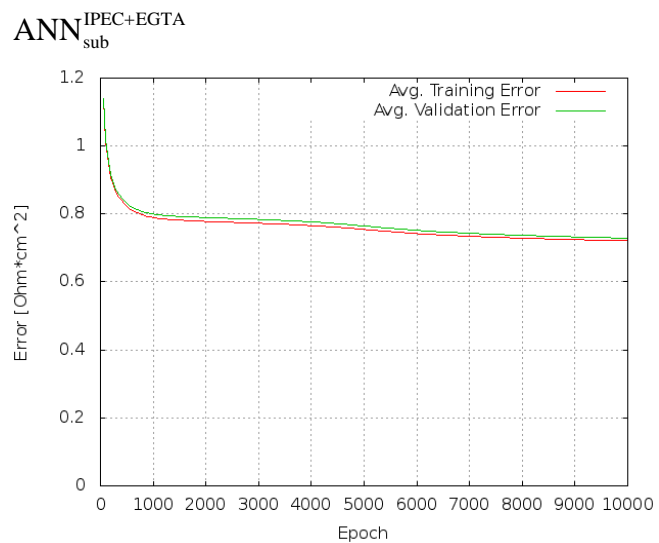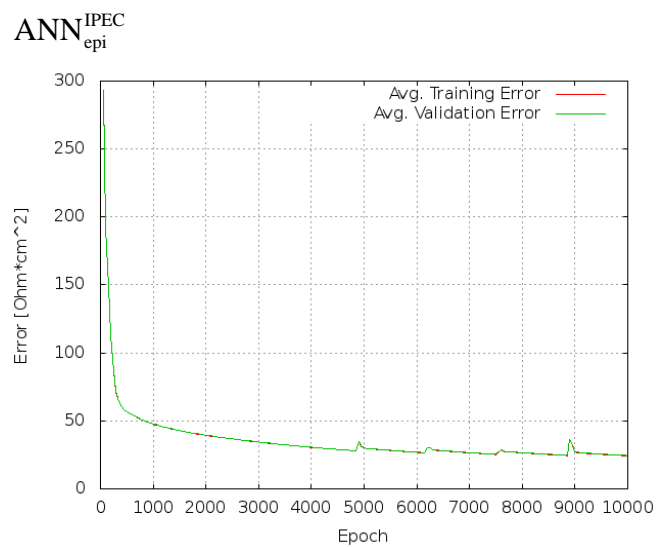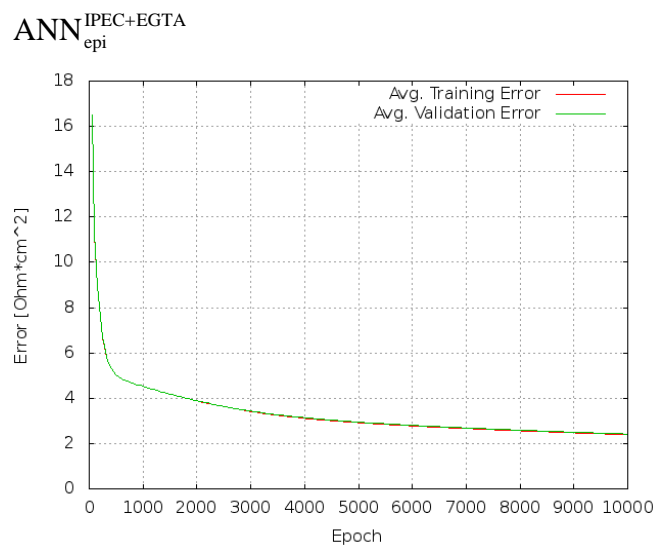

**Fig. S4. ANN training progress**

Development of average deviations from target values of training and validation data during 10,000 training epochs. For results see Table S4.
