# Supplementary material for: Discerning Apical and Basolateral Properties of HT-29/B6 and IPEC-J2 Cell Layers by Impedance Spectroscopy, Mathematical Modeling and Machine Learning
Source: PubMed Central journal article supplement (PMC3698131; doi:10.1371/journal.pone.0062913), 2013-07-01
Supplement: pone.0062913.s005.pdf [file pone.0062913.s005.pdf]

$ANN_{sub}^{HT}$

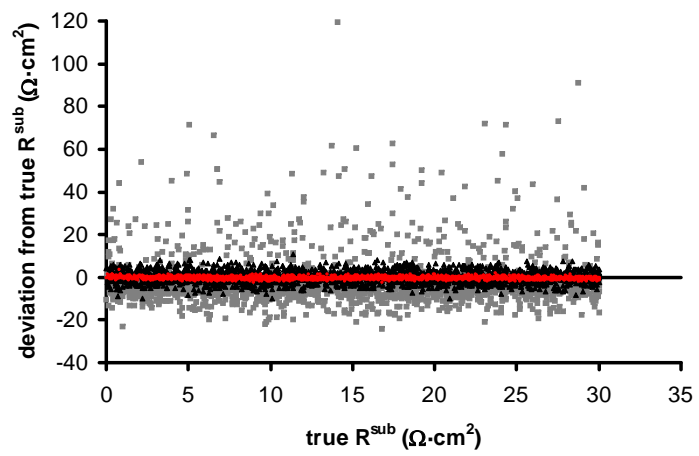

$ANN_{sub}^{HT+EGTA}$

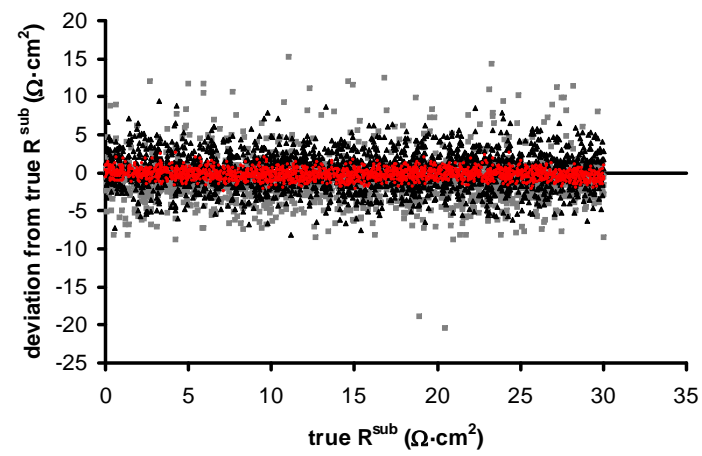

$ANN_{epi}^{HT}$

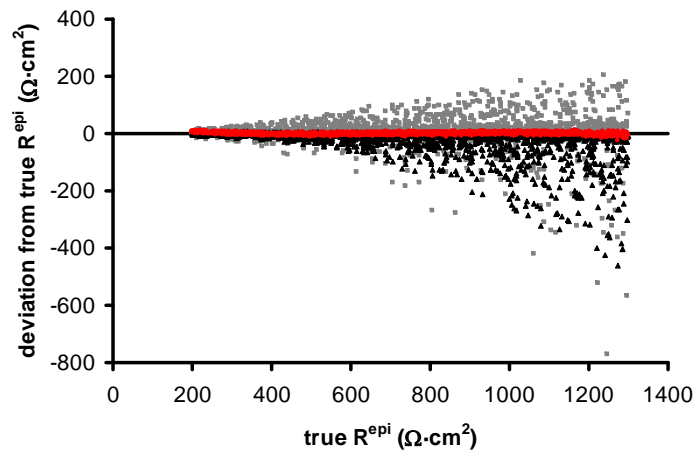

$ANN_{epi}^{HT+EGTA}$

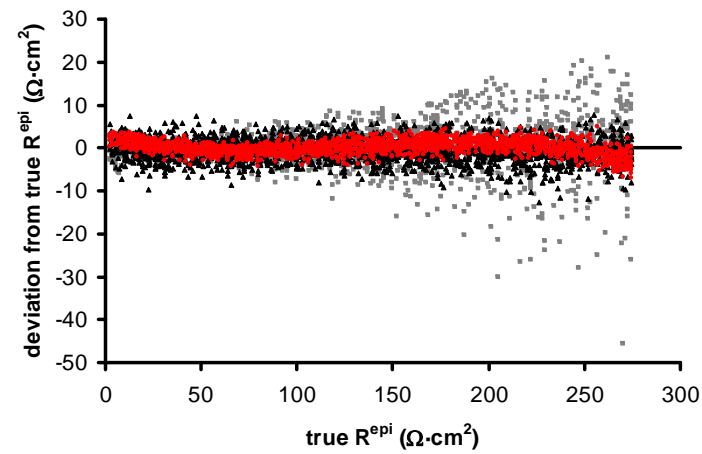

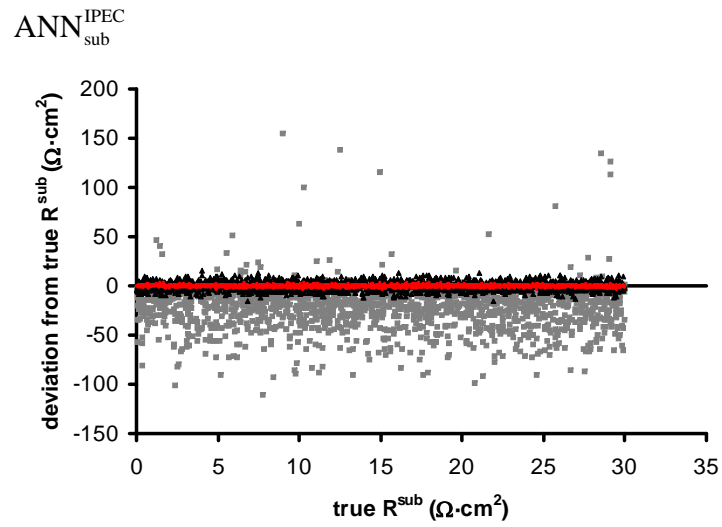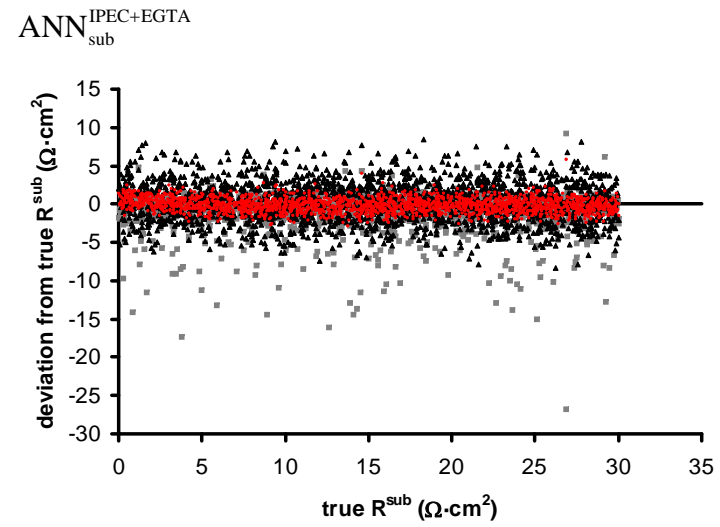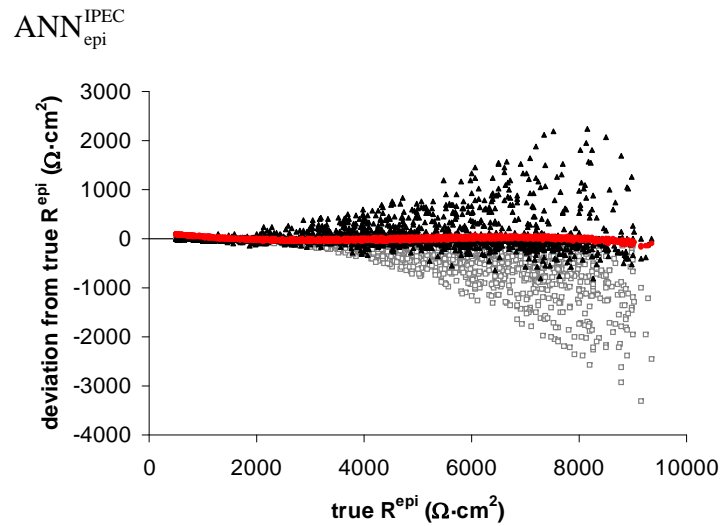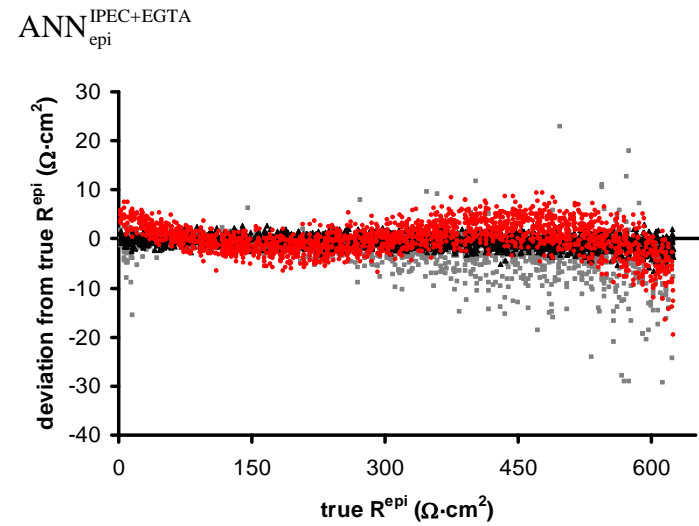

**Fig. S5: Comparison of M1, M2 and ANN performance on modeled impedance spectra**

Deviations of estimated  $R^{epi}$  and  $R^{sub}$  values (estimated minus true value), using method M1 ( $\blacktriangle$ ), M2( $\blacksquare$ ) and the indicated ANN ( $\bullet$ ) are plotted against the respective true value. ANN perform better than M1 and M2 in all cases except ANN<sub>epi</sub><sup>IPEC+EGTA</sup>.
