# Supplementary material for: Discerning Apical and Basolateral Properties of HT-29/B6 and IPEC-J2 Cell Layers by Impedance Spectroscopy, Mathematical Modeling and Machine Learning
Source: PubMed Central journal article supplement (PMC3698131; doi:10.1371/journal.pone.0062913), 2013-07-01
Supplement: pone.0062913.s006.pdf [file pone.0062913.s006.pdf]

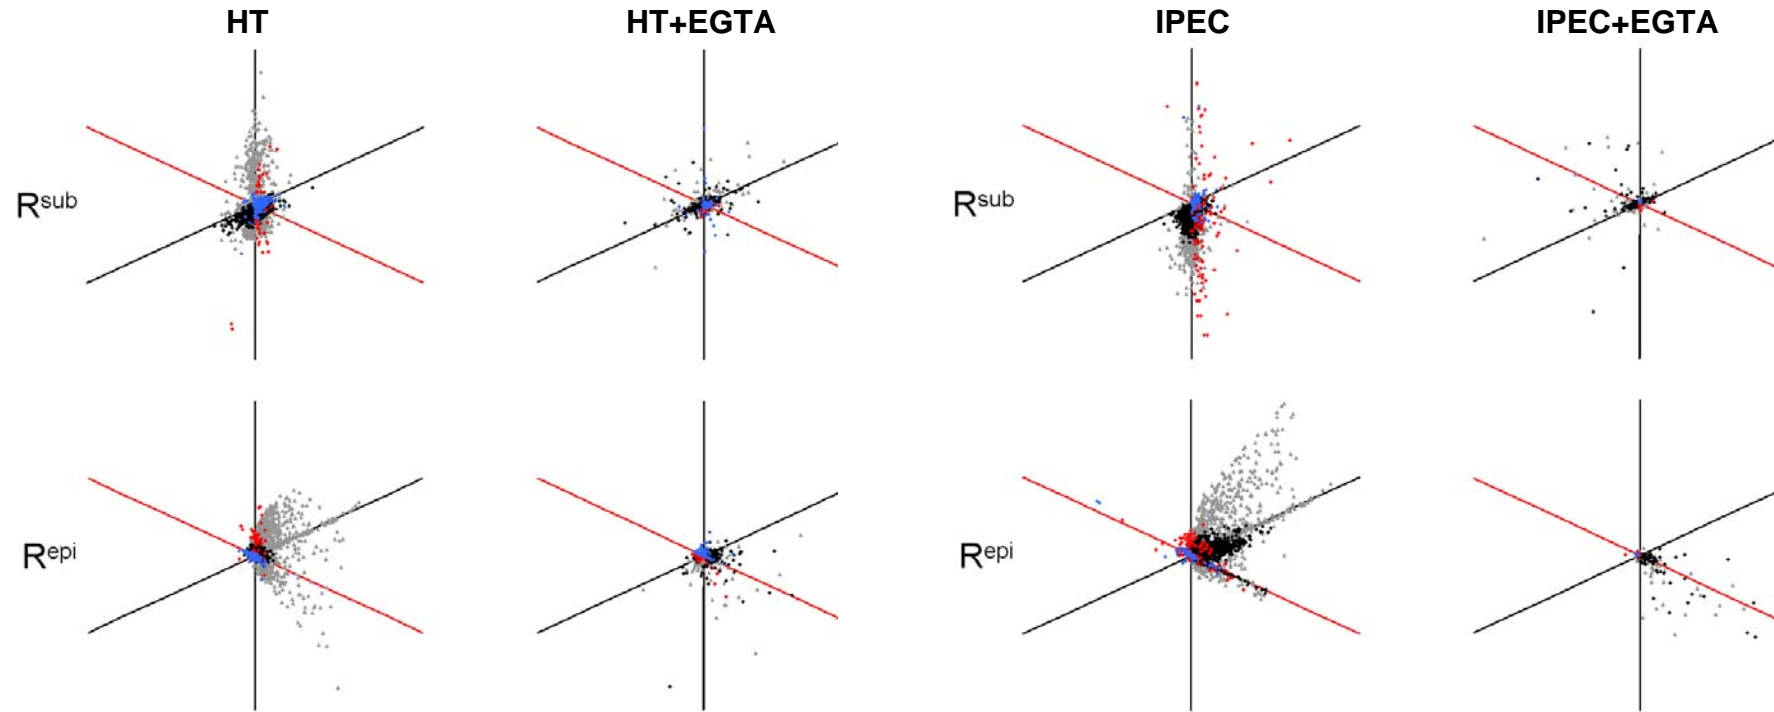

**Fig. S6: Similarity diagrams comparing M1, M2 and ANN performance on modeled vs. experimental impedance spectra**

Similarity diagrams of data were derived for modeled and measured spectra (HT, IPEC, HT+EGTA, IPEC+EGTA, targeting either  $R^{\text{epi}}$  or  $R^{\text{sub}}$  as indicated) as illustrated in Fig. 2 of the main text. Data scatter along the red axis indicates a greater dissimilarity of values obtained with the appropriate ANN when method M1 and M2 yield very similar results.

In all cases, distribution of data points from modeled spectra with  $\tau$ -ratios  $< 5$  ( $\blacklozenge$ ) is similar to the distribution of data points from measured spectra ( $\bullet$ ) obtained in the absence of forskolin or nystatin. Conversely, distribution of data points from modeled spectra with  $\tau$ -ratios  $> 5$  ( $\blacktriangle$ ) is similar to the distribution of data points from experimental spectra ( $\blacklozenge$ ) obtained in the presence of forskolin or nystatin.
