# Supplementary material for: Discerning Apical and Basolateral Properties of HT-29/B6 and IPEC-J2 Cell Layers by Impedance Spectroscopy, Mathematical Modeling and Machine Learning
Source: PubMed Central journal article supplement (PMC3698131; doi:10.1371/journal.pone.0062913), 2013-07-01
Supplement: pone.0062913.s007.pdf [file pone.0062913.s007.pdf]

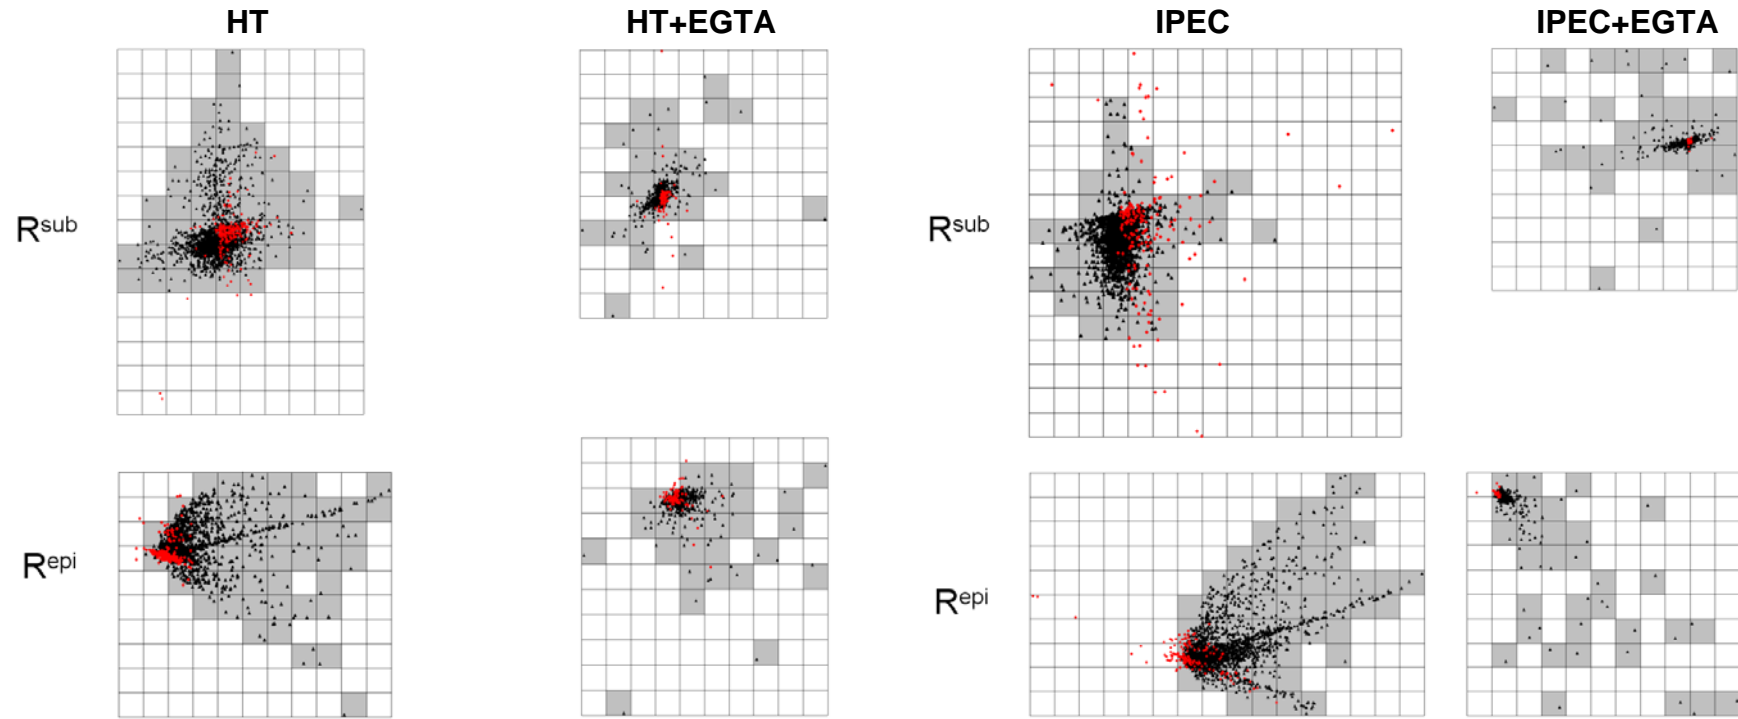

**Fig. S7: Evaluation of similarity diagrams**

Shaded “reference” areas, indicate areas covered by data points obtained from modeled spectra ( $\blacktriangle$ ) within a 10 by 10 grid. Percentage of data points from measured spectra ( $\blacklozenge$ ) within the reference areas was evaluated.

Results are given as % (n/m), with m being the total number of data points and n the number of data points within the reference area:

|                       |                 |                         |                 |
|-----------------------|-----------------|-------------------------|-----------------|
| $ANN_{sub}^{HT}$      | 98.2% (276/281) | $ANN_{sub}^{IPEC}$      | 80.1% (133/166) |
| $ANN_{sub}^{HT+EGTA}$ | 97.3% (109/112) | $ANN_{sub}^{IPEC+EGTA}$ | 100% (26/26)    |
| $ANN_{epi}^{HT}$      | 98.2% (276/281) | $ANN_{epi}^{IPEC}$      | 82.5% (137/166) |
| $ANN_{epi}^{HT+EGTA}$ | 95.5% (107/112) | $ANN_{epi}^{IPEC+EGTA}$ | 96.2% (25/26)   |

High percentages indicate that modeled spectra used for ANN training appropriately cover physiologically relevant parameter ranges.
