# Supplementary material for: Discerning Apical and Basolateral Properties of HT-29/B6 and IPEC-J2 Cell Layers by Impedance Spectroscopy, Mathematical Modeling and Machine Learning
Source: PubMed Central journal article supplement (PMC3698131; doi:10.1371/journal.pone.0062913), 2013-07-01
Supplement: pone.0062913.s008.pdf [file pone.0062913.s008.pdf]

**Table S1:** Characteristics of modeled datasets.

|                               | <b>HT</b>      | <b>HT+EGTA</b> | <b>IPEC</b>    | <b>IPEC+EGTA</b> |
|-------------------------------|----------------|----------------|----------------|------------------|
| Number of samples             | 331,794        | 167,379        | 913,521        | 536,057          |
| Number of features per sample | 84             | 84             | 84             | 84               |
| Exact target values known     | Yes            | Yes            | Yes            | Yes              |
| Target domain A               | 0.0            | 0.0            | 0.0            | 0.0              |
| Range of target domain B      | 200.0 – 1299.5 | 2.7 – 274.3    | 500.8 – 9344.2 | 1.4 – 624.9      |

Datasets model four different experiment conditions (HT and IPEC cells before the application of EGTA and in the presence of EGTA). Target domain A refers to subepithelial resistance ( $R^{\text{sub}}$ ), target domain B to epithelial resistance ( $R^{\text{epi}}$ ).
