# Supplementary material for: Discerning Apical and Basolateral Properties of HT-29/B6 and IPEC-J2 Cell Layers by Impedance Spectroscopy, Mathematical Modeling and Machine Learning
Source: PubMed Central journal article supplement (PMC3698131; doi:10.1371/journal.pone.0062913), 2013-07-01
Supplement: pone.0062913.s009.pdf [file pone.0062913.s009.pdf]

**Table S2:** Characteristics of datasets used for training ANNs to estimate epithelial resistance ( $R^{\text{epi}}$ ).

|                               | <b>HT</b>                             | <b>HT+EGTA</b>                             | <b>IPEC</b>                             | <b>IPEC+EGTA</b>                             |
|-------------------------------|---------------------------------------|--------------------------------------------|-----------------------------------------|----------------------------------------------|
| Number of training samples    | 25,000                                | 25,000                                     | 25,000                                  | 25,000                                       |
| Number of test samples        | 25,000                                | 25,000                                     | 25,000                                  | 25,000                                       |
| Number of features per sample | 20                                    | 20                                         | 20                                      | 20                                           |
| Exact target value known      | Yes                                   | Yes                                        | Yes                                     | Yes                                          |
| Range of target domain        | 200.0 – 1299.5                        | 2.7 – 274.3                                | 500.8 – 9344.2                          | 1.4 – 624.9                                  |
| Name of trained ANN           | $\text{ANN}_{\text{epi}}^{\text{HT}}$ | $\text{ANN}_{\text{epi}}^{\text{HT+EGTA}}$ | $\text{ANN}_{\text{epi}}^{\text{IPEC}}$ | $\text{ANN}_{\text{epi}}^{\text{IPEC+EGTA}}$ |

Datasets were created by random selection from the modeled datasets (Table S1). For use with ANNs only curve features 1-20 (=real and imaginary parts of the impedance values derived from the 10 lowest frequencies) were used. Test samples were also used for validation during training (solely for monitoring learning progress, not for weight adjustment).
