# Supplementary material for: Discerning Apical and Basolateral Properties of HT-29/B6 and IPEC-J2 Cell Layers by Impedance Spectroscopy, Mathematical Modeling and Machine Learning
Source: PubMed Central journal article supplement (PMC3698131; doi:10.1371/journal.pone.0062913), 2013-07-01
Supplement: pone.0062913.s011.pdf [file pone.0062913.s011.pdf]

**Table S4:** Error of test data for all 8 employed neural networks, determined after ANN training was completed. For a performance comparison with reference methods M1 and M2 see Fig. 5a and 5b.

|                                              | <b>Average error</b><br>[ $\Omega \cdot \text{cm}^2$ ] | <b>Minimum error</b><br>[ $\Omega \cdot \text{cm}^2$ ] | <b>Maximum error</b><br>[ $\Omega \cdot \text{cm}^2$ ] |
|----------------------------------------------|--------------------------------------------------------|--------------------------------------------------------|--------------------------------------------------------|
| <b>HT-29/B6</b>                              |                                                        |                                                        |                                                        |
| $\text{ANN}_{\text{sub}}^{\text{HT}}$        | $\pm 0.53$                                             | -3.40                                                  | +2.75                                                  |
| $\text{ANN}_{\text{sub}}^{\text{HT+EGTA}}$   | $\pm 0.55$                                             | -3.04                                                  | +2.57                                                  |
| $\text{ANN}_{\text{epi}}^{\text{HT}}$        | $\pm 3.11$                                             | -14.17                                                 | +34.84                                                 |
| $\text{ANN}_{\text{epi}}^{\text{HT+EGTA}}$   | $\pm 1.17$                                             | -5.54                                                  | +11.36                                                 |
| <b>IPEC-J2</b>                               |                                                        |                                                        |                                                        |
| $\text{ANN}_{\text{sub}}^{\text{IPEC}}$      | $\pm 0.79$                                             | -4.38                                                  | +4.81                                                  |
| $\text{ANN}_{\text{sub}}^{\text{IPEC+EGTA}}$ | $\pm 0.73$                                             | -5.78                                                  | 3.55                                                   |
| $\text{ANN}_{\text{epi}}^{\text{IPEC}}$      | $\pm 24.52$                                            | -98.88                                                 | +192.93                                                |
| $\text{ANN}_{\text{epi}}^{\text{IPEC+EGTA}}$ | $\pm 2.42$                                             | -10.04                                                 | +19.96                                                 |
