# Supplementary material for: Discerning Apical and Basolateral Properties of HT-29/B6 and IPEC-J2 Cell Layers by Impedance Spectroscopy, Mathematical Modeling and Machine Learning
Source: PubMed Central journal article supplement (PMC3698131; doi:10.1371/journal.pone.0062913), 2013-07-01
Supplement: pone.0062913.s012.pdf [file pone.0062913.s012.pdf]

**Table S5:** Characteristics of measured datasets.

|                               | <b>HT</b>  | <b>HT+EGTA</b> | <b>IPEC</b> | <b>IPEC+EGTA</b> |
|-------------------------------|------------|----------------|-------------|------------------|
| Number of samples             | 281        | 112            | 166         | 26               |
| Number of features per sample | 84         | 84             | 84          | 84               |
| Exact target values known     | No         | No             | No          | No               |
| Range of target domain A (M1) | 2.1 – 28   | 0.8 – 29       | -17 – 44    | -10 – 20         |
| Range of target domain A (M2) | -33 – 35   | -0.3 – 34      | -66 – 89    | -15 – 13         |
| Range of target domain B (M1) | 231 – 1228 | 7 – 263        | 640 – 10962 | 26 – 586         |
| Range of target domain B (M2) | 250 – 1233 | 3.5 – 250      | 623 – 11026 | 26 – 608         |

Target domain A refers to subepithelial resistance ( $R^{\text{sub}}$ ), target domain B to epithelial resistance ( $R^{\text{epi}}$ ). Range of target domains approximated using reference methods M1 and M2 (cf. methods and materials section).
