# Supplementary material for: Discerning Apical and Basolateral Properties of HT-29/B6 and IPEC-J2 Cell Layers by Impedance Spectroscopy, Mathematical Modeling and Machine Learning
Source: PubMed Central journal article supplement (PMC3698131; doi:10.1371/journal.pone.0062913), 2013-07-01
Supplement: pone.0062913.s014.pdf [file pone.0062913.s014.pdf]

## Impact of inaccurate determination of $R^{\text{sub}}$ and $R^{\text{epi}}$

As described by Krug et al (2009, see also Fig. 4B and C of the present paper), transcellular ( $R^{\text{trans}}$ ) and paracellular ( $R^{\text{para}}$ ) resistances of an epithelial cell layer can be estimated from experiments during which  $R^{\text{para}}$  is altered (e.g. by  $\text{Ca}^{2+}$  switch) and the resulting change in paracellular conductance is monitored by measuring changes in the flux of a paracellular marker substance (e.g. fluorescein). Routinely, three values before and at least three values after inducing the  $\text{Ca}^{2+}$  switch are used for the evaluation of one cell layer.

For simplification, here only one value is considered before (transepithelial resistance,  $R_1^{\text{T}}$ ; flux  $J_1$ ) and one value after inducing the  $\text{Ca}^{2+}$  switch ( $R_2^{\text{T}}$ ;  $J_2$ ) are considered during the following calculations.  $R^{\text{T}}$  is the sum of the subepithelial and the epithelial resistance ( $R^{\text{T}} = R^{\text{sub}} + R^{\text{epi}}$ ).  $X$  is defined as  $J_1/J_2 (= R_2^{\text{para}} / R_1^{\text{para}})$ .

In theory, this allows direct calculation of  $R_1^{\text{para}}$  from measured parameters:

$$R_1^{\text{para}} = \frac{R_1^{\text{epi}} \cdot R_2^{\text{epi}} \cdot (1 - X)}{X \cdot (R_1^{\text{epi}} - R_2^{\text{epi}})} \quad (\text{Eq. S6})$$

In reality, however, not the true  $R^{\text{epi}}$ , but only an error-inherent approximation  $R^{\text{epi}} + \Delta R^{\text{epi}}$  can be determined for each measurement with  $\Delta R^{\text{epi}} = \Delta R^{\text{T}} + \Delta R^{\text{sub}}$ . For Eq. S6, this implies:

$$R_1^{\text{para}'} = \frac{(R_1^{\text{epi}} + \Delta R_1^{\text{epi}}) \cdot (R_2^{\text{epi}} + \Delta R_2^{\text{epi}}) \cdot (1 - X)}{X \cdot ((R_1^{\text{epi}} + \Delta R_1^{\text{epi}}) - (R_2^{\text{epi}} + \Delta R_2^{\text{epi}}))} = \frac{(R_1^{\text{epi}} \cdot R_2^{\text{epi}}) \cdot (1 - X)}{X \cdot ((R_1^{\text{epi}} - R_2^{\text{epi}}) + (\Delta R_1^{\text{epi}} - \Delta R_2^{\text{epi}}))} + \frac{(R_1^{\text{epi}} \cdot \Delta R_2^{\text{epi}} + R_2^{\text{epi}} \cdot \Delta R_1^{\text{epi}} + \Delta R_1^{\text{epi}} \cdot \Delta R_2^{\text{epi}}) \cdot (1 - X)}{X \cdot ((R_1^{\text{epi}} - R_2^{\text{epi}}) + (\Delta R_1^{\text{epi}} - \Delta R_2^{\text{epi}}))} \quad (\text{Eq. S7})$$

While a multiplicative impact is not apparent in this representation, it becomes more obvious if  $\Delta R_1^{\text{epi}}$  and  $\Delta R_2^{\text{epi}}$  are assumed to be of equal value and a representative variable  $\Delta R^{\text{epi}} = \Delta R_1^{\text{epi}} = \Delta R_2^{\text{epi}}$  is introduced. Using this assumption reveals that even small differences in  $R^{\text{epi}}$  values can lead to considerable differences for  $R^{\text{para}}$ .

$$R_1^{\text{para}'} = \frac{R_1^{\text{epi}} \cdot R_2^{\text{epi}} \cdot (1 - X)}{X \cdot (R_1^{\text{epi}} - R_2^{\text{epi}})} + \frac{(R_1^{\text{epi}} \cdot \Delta R^{\text{epi}} + R_2^{\text{epi}} \cdot \Delta R^{\text{epi}} + (\Delta R^{\text{epi}})^2) \cdot (1 - X)}{X \cdot (R_1^{\text{epi}} - R_2^{\text{epi}})} = \frac{R_1^{\text{epi}} \cdot R_2^{\text{epi}} \cdot (1 - X)}{X \cdot (R_1^{\text{epi}} - R_2^{\text{epi}})} + \Delta R^{\text{epi}} \cdot \frac{(R_1^{\text{epi}} + R_2^{\text{epi}} + \Delta R^{\text{epi}}) \cdot (1 - X)}{X \cdot (R_1^{\text{epi}} - R_2^{\text{epi}})} \quad (\text{Eq. S8})$$

This shows that  $\Delta R^{\text{epi}}$  do not simply add up within this calculation, but have multiplicative impact. Consequently, calculation of  $R^{\text{para}}$  suffers considerably from even small deviations in  $R_1^{\text{epi}}$  and  $R_2^{\text{epi}}$ .

This effect can be quantified by its relative deviation. For determining the relative deviation, it is useful to define a deviation coefficient  $\delta$ :

$$\delta = \frac{(R_1^{\text{epi}} + R_2^{\text{epi}} + \Delta R^{\text{epi}}) \cdot (1 - X)}{X \cdot (R_1^{\text{epi}} - R_2^{\text{epi}})} \quad (\text{Eq. S9})$$

Assuming again that  $\Delta R_1^{\text{epi}}$  and  $\Delta R_2^{\text{epi}}$  are of the same value, the relative deviation  $\Delta R_{\text{rel}}^{\text{para}}$  is given by

$$\Delta R_{\text{rel}}^{\text{para}} = \frac{\Delta R^{\text{epi}} \cdot \delta}{R_1^{\text{para}}} = \Delta R^{\text{epi}} \cdot \left( \frac{R_1^{\text{epi}} + R_2^{\text{epi}} + \Delta R^{\text{epi}}}{R_1^{\text{epi}} \cdot R_2^{\text{epi}}} \right) = \Delta R^{\text{epi}} \cdot \frac{R_1^{\text{epi}} + R_2^{\text{epi}}}{R_1^{\text{epi}} \cdot R_2^{\text{epi}}} + (\Delta R^{\text{epi}})^2 \cdot \frac{1}{R_1^{\text{epi}} \cdot R_2^{\text{epi}}} \quad (\text{Eq. S10})$$

As  $\frac{R_1^{\text{epi}} + R_2^{\text{epi}}}{R_1^{\text{epi}} \cdot R_2^{\text{epi}}}$  is constant for given cells with given  $R_1^{\text{epi}}$  and  $R_2^{\text{epi}}$ , it can be concluded for the first term that:

$$\Delta R^{\text{epi}} \cdot \frac{R_1^{\text{epi}} + R_2^{\text{epi}}}{R_1^{\text{epi}} \cdot R_2^{\text{epi}}} \in \Omega(\Delta R^{\text{epi}}) \quad (\text{Eq. S11})$$

where  $\Omega$  denotes Landau's symbol, meaning  $\Delta R^{\text{epi}}$  as a function is a lower boundary for  $\Delta R_{\text{rel}}^{\text{para}}$ .

Analogously,  $\frac{1}{R_1^{\text{epi}} \cdot R_2^{\text{epi}}}$  is constant and it follows for the second term:

$$(\Delta R^{\text{epi}})^2 \cdot \frac{1}{R_1^{\text{epi}} \cdot R_2^{\text{epi}}} \in \Omega((\Delta R^{\text{epi}})^2) \quad (\text{Eq. S12})$$

This implies that  $\Delta R_{\text{rel}}^{\text{para}}$  grows at least at the order of the deviation of the estimated  $R^{\text{epi}}$  from the target value:

$$\Delta R_{\text{rel}}^{\text{para}} \in \Omega(\Delta R^{\text{epi}}) \quad (\text{Eq. S13})$$

Therefore, the overall growth of the relative error of  $R^{\text{para}}$  estimates can be considered at least linear and primarily depend on  $\Delta R^{\text{epi}}$ .

## References

Krug, S. M., M. Fromm, and D. Günzel. 2009. Two-path impedance spectroscopy for measuring paracellular and transcellular epithelial resistance. *Biophys. J.* 97:2202–2211.
