# Supplementary material for: Discerning Apical and Basolateral Properties of HT-29/B6 and IPEC-J2 Cell Layers by Impedance Spectroscopy, Mathematical Modeling and Machine Learning
Source: PubMed Central journal article supplement (PMC3698131; doi:10.1371/journal.pone.0062913), 2013-07-01
Supplement: pone.0062913.s016.pdf [file pone.0062913.s016.pdf]

## Error model

Data scatter added to theoretical impedance spectra was modeled as function of corresponding frequency and transepithelial resistance  $R^T$ . The model is based on standard deviations (SDs) of  $Z^{re}$  and  $Z^{im}$ , respectively, which were modeled for each frequency and expressed as % of the DC resistance value.

For  $Z^{re}$  at frequency  $f$ , a second-order Fourier series ( $n=2$ ) was employed:

$$SD_{re}(f) = a_0 + \sum_{i=1}^{n=2} a_i \cdot \cos(nwf) + b_i \cdot \sin(nwf) \quad (\text{Eq. S14})$$

where  $w=5.353 \cdot 10^{-5}$ ,  $a_0=4.848$ ,  $a_1=-4.11$ ,  $b_1=-0.8092$ ,  $a_2=-0.3583$ , and  $b_2=0.2014$  were determined as best fit to the measured data.

For  $Z^{im}$  at frequency  $f$ , a fourth-order polynomial function ( $n=4$ ) was used:

$$SD_{im}(f) = a_0 + \sum_{i=1}^{n=4} a_i \cdot f^i \quad (\text{Eq. S15})$$

where  $a_0=0.1889$ ,  $a_1=0.0002737$ ,  $a_2=1.863 \cdot 10^{-9}$ ,  $a_3=-1.906 \cdot 10^{-13}$ ,  $a_4=2.267 \cdot 10^{-18}$  were determined as best fit to the measured data.

To account for dependence of data scatter on  $R^T$ ,  $SD_{re}$  and  $SD_{im}$  dynamics at 1.3 Hz were approximated by:

$$SD_{re}(1.3\text{Hz}) = 0.636^{R^T} - 0.3278 \quad (\text{Eq. S16})$$

$$SD_{im}(1.3\text{Hz}) = 8.7008^{R^T} - 0.8689 \quad (\text{Eq. S17})$$

This model was used to substitute  $a_0$  in Eqs. A1 and A2 with  $a_0(R^T) = a_0 + SD_{re}(1.3\text{Hz})$  and  $a_0(R^T) = a_0 + SD_{im}(1.3\text{Hz})$ , respectively, where  $a_0$  (obtained from  $R^T \approx 500 \Omega \cdot \text{cm}^2$ ) had been normalized by  $SD_{re}(1.3\text{Hz})$  or  $SD_{im}(1.3\text{Hz})$  obtained at  $R^T \approx 500 \Omega \cdot \text{cm}^2$ , respectively.
